# Supplementary material for: Reduced bronchoalveolar macrophage phagocytosis and cytotoxic effects after controlled short-term exposure to wood smoke in healthy humans.
Source: Research Square preprint supplement (doi:10.21203/rs.3.rs-2598804/v1), 2023-02-27
Supplement: Supplementary file 1 [file 904a2bf7b13fef4132b661e6.docx]

**Supplement**

**Supplement 1. DNA-damage in BAL and BW**

**Supplement 1.** *DNA damage* *measured in* ***A:*** *bronchial wash and* ***B:*** *bronchoalveolar lavage following exposure of healthy subjects to wood smoke or filtered air. DNA damage was quantified using the Comet assay and expressed as Olive tail moment.* *No statistically significant change was seen between the exposures. The red line indicates median value.*

**Supplement 2. Comet assay from BW and BAL**


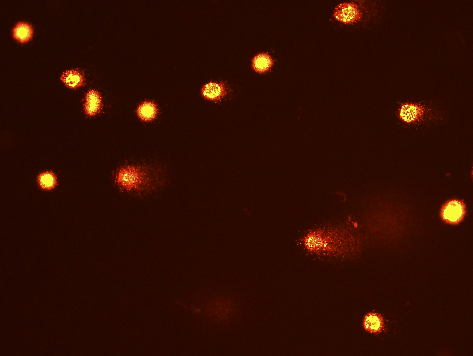
 *
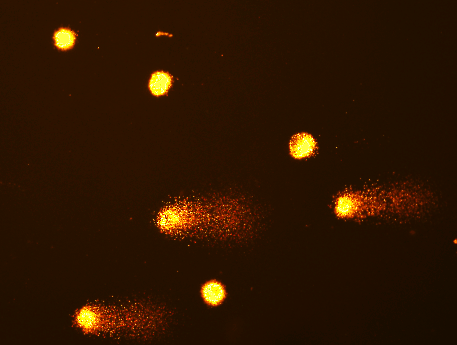
*

**Supplement 2.** *Comet assay performed on cells from (A) bronchial wash (B) bronchoalveolar lavage.*
